# Supplementary material
Source: PubMed Central journal article supplement (PMC9560992)

## Supplemental Digital Content

Parks RM, Nunez Y, Balalian A, Gibson EA, Hansen J, Raaschou-Nielsen O, Ketzel M, Khan J, Brandt J, Vermeulen R, Peters S, Goldsmith J, Re DB, Weisskopf MG, Kioumourtzoglou MA, Long-term traffic-related air pollutant exposure and amyotrophic lateral sclerosis diagnosis in Denmark: A Bayesian hierarchical analysis.

**eTable 1.** Summary of 5-year average pollutant concentrations of controls by socioeconomic status (all in  $\mu\text{g}/\text{m}^3$ ).

**eTable 2.** Summary of 5-year average pollutant concentrations of controls by civil status (all in  $\mu\text{g}/\text{m}^3$ ).

**eTable 3.** Summary of 5-year average pollutant concentrations of controls by last reported place of residence (all in  $\mu\text{g}/\text{m}^3$ ).

**eTable 4.** Summary of 5-year average pollutant concentrations of controls by place of birth (all in  $\mu\text{g}/\text{m}^3$ ).

**eFigure 1.** Average concentration of included pollutants (EC,  $\text{NO}_x$ , CO,  $\text{PM}_{2.5}$ ,  $\text{O}_3$ ) in 1 km x 1 km resolution for year 2000 (middle of study period 1989-2013).

**eFigure 2.** Sensitivity of percentage change in odds of ALS diagnosis to (B) inclusion of  $\text{O}_3$ ; (C) inclusion of parish-level SES; (D-F) single-pollution models; (G-N) various hyperpriors; and (O-P) more iterations per chain.

This supplementary material has been provided by the authors to give readers additional information about their work.

**eTable 1.** Summary of 5-year average pollutant concentrations of controls by socioeconomic status (all in  $\mu\text{g}/\text{m}^3$ ).

| Pollutant                          | Overall, N =<br>19,298 <sup>1</sup> | Group 1 (Highest), N<br>= 1,886 <sup>1</sup> | Group 2, N =<br>2,340 <sup>1</sup> | Group 3, N =<br>3,575 <sup>1</sup> | Group 4, N =<br>5,522 <sup>1</sup> | Group 5 (Lowest), N<br>= 3,702 <sup>1</sup> | Group 9 (Unknown), N<br>= 2,273 <sup>1</sup> |
|------------------------------------|-------------------------------------|----------------------------------------------|------------------------------------|------------------------------------|------------------------------------|---------------------------------------------|----------------------------------------------|
| <b>EC</b>                          | 0.85 (0.42)                         | 0.89 (0.42)                                  | 0.84 (0.42)                        | 0.79 (0.37)                        | 0.85 (0.42)                        | 0.84 (0.41)                                 | 0.92 (0.48)                                  |
| <b>NO<sub>x</sub></b>              | 27 (20)                             | 29 (20)                                      | 27 (20)                            | 25 (17)                            | 27 (20)                            | 27 (19)                                     | 30 (23)                                      |
| <b>CO</b>                          | 237 (105)                           | 244 (103)                                    | 233 (104)                          | 225 (89)                           | 237 (104)                          | 237 (102)                                   | 258 (130)                                    |
| <b>non-EC<br/>PM<sub>2.5</sub></b> | 11.76 (2.37)                        | 11.75 (2.21)                                 | 11.54 (2.24)                       | 11.58 (2.30)                       | 11.69 (2.34)                       | 11.93 (2.43)                                | 12.13 (2.62)                                 |
| <b>O<sub>3</sub></b>               | 52.0 (6.0)                          | 51.1 (5.9)                                   | 52.0 (5.9)                         | 53.0 (5.6)                         | 51.9 (5.9)                         | 52.2 (5.9)                                  | 50.7 (6.4)                                   |

<sup>1</sup>Mean (SD)

**eTable 2.** Summary of 5-year average pollutant concentrations of controls by civil status (all in  $\mu\text{g}/\text{m}^3$ ).

| Pollutant                      | Overall, N = 19,298 <sup>1</sup> | Married, N = 11,747 <sup>1</sup> | Divorced, N = 2,270 <sup>1</sup> | Widower, N = 3,498 <sup>1</sup> | Never married, N = 1,783 <sup>1</sup> |
|--------------------------------|----------------------------------|----------------------------------|----------------------------------|---------------------------------|---------------------------------------|
| <b>EC</b>                      | 0.85 (0.42)                      | 0.81 (0.37)                      | 0.92 (0.48)                      | 0.90 (0.48)                     | 0.91 (0.46)                           |
| <b>NO<sub>x</sub></b>          | 27 (20)                          | 25 (17)                          | 31 (23)                          | 30 (23)                         | 30 (22)                               |
| <b>CO</b>                      | 237 (105)                        | 228 (92)                         | 252 (124)                        | 252 (123)                       | 247 (114)                             |
| <b>non-EC PM<sub>2.5</sub></b> | 11.76 (2.37)                     | 11.68 (2.33)                     | 11.71 (2.33)                     | 12.09 (2.51)                    | 11.63 (2.31)                          |
| <b>O<sub>3</sub></b>           | 52.0 (6.0)                       | 52.5 (5.6)                       | 50.8 (6.4)                       | 51.3 (6.5)                      | 51.1 (6.3)                            |

<sup>1</sup>Mean (SD)

**eTable 3.** Summary of 5-year average pollutant concentrations of controls by last reported place of residence (all in  $\mu\text{g}/\text{m}^3$ ).

| Pollutant                          | Overall, N =<br>19,298 <sup>1</sup> | Greater Copenhagen, N =<br>6,450 <sup>1</sup> | Big cities of Denmark, N =<br>3,085 <sup>1</sup> | Rest of Denmark, N =<br>9,759 <sup>1</sup> | Greenland, N =<br>4 <sup>1</sup> |
|------------------------------------|-------------------------------------|-----------------------------------------------|--------------------------------------------------|--------------------------------------------|----------------------------------|
| <b>EC</b>                          | 0.85 (0.42)                         | 1.39 (0.65)                                   | 0.87 (0.38)                                      | 0.75 (0.32)                                | 0.59 (0.14)                      |
| <b>NO<sub>x</sub></b>              | 27 (20)                             | 53 (33)                                       | 28 (18)                                          | 23 (15)                                    | 15 (4)                           |
| <b>CO</b>                          | 237 (105)                           | 379 (184)                                     | 237 (91)                                         | 216 (77)                                   | 181 (20)                         |
| <b>non-EC<br/>PM<sub>2.5</sub></b> | 11.76 (2.37)                        | 12.96 (2.67)                                  | 11.80 (2.33)                                     | 11.53 (2.29)                               | 10.42 (1.49)                     |
| <b>O<sub>3</sub></b>               | 52.0 (6.0)                          | 43.2 (6.3)                                    | 51.5 (5.2)                                       | 53.7 (5.1)                                 | 58.3 (4.7)                       |

<sup>1</sup>Mean (SD)

**eTable 4.** Summary of 5-year average pollutant concentrations by place of birth (all in  $\mu\text{g}/\text{m}^3$ ).

| Pollutant                          | Overall, N =<br>19,298 <sup>1</sup> | Greater Copenhagen, N<br>= 4,027 <sup>1</sup> | Big cities of Denmark,<br>N = 6,566 <sup>1</sup> | Rest of Denmark, N<br>= 7,461 <sup>1</sup> | Greenland, N =<br>190 <sup>1</sup> | Foreign, N =<br>943 <sup>1</sup> | Unknown, N =<br>111 <sup>1</sup> |
|------------------------------------|-------------------------------------|-----------------------------------------------|--------------------------------------------------|--------------------------------------------|------------------------------------|----------------------------------|----------------------------------|
| <b>EC</b>                          | 0.85 (0.42)                         | 1.01 (0.51)                                   | 0.83 (0.40)                                      | 0.76 (0.35)                                | 0.92 (0.36)                        | 0.97 (0.43)                      | 0.84 (0.36)                      |
| <b>NO<sub>x</sub></b>              | 27 (20)                             | 35 (25)                                       | 26 (18)                                          | 23 (16)                                    | 30 (17)                            | 33 (22)                          | 28 (18)                          |
| <b>CO</b>                          | 237 (105)                           | 275 (136)                                     | 230 (96)                                         | 220 (86)                                   | 254 (92)                           | 256 (111)                        | 242 (96)                         |
| <b>non-EC<br/>PM<sub>2.5</sub></b> | 11.76 (2.37)                        | 12.07 (2.39)                                  | 11.66 (2.35)                                     | 11.68 (2.38)                               | 12.07 (2.32)                       | 11.59 (2.12)                     | 12.32 (2.68)                     |
| <b>O<sub>3</sub></b>               | 52.0 (6.0)                          | 48.9 (6.4)                                    | 52.4 (5.5)                                       | 53.6 (5.3)                                 | 50.3 (5.6)                         | 49.3 (5.8)                       | 52.2 (5.8)                       |

<sup>1</sup>Mean (SD)

**eFigure 1.** Average concentration of included pollutants (EC, NO<sub>x</sub>, CO, PM<sub>2.5</sub>, O<sub>3</sub>) in 1 km x 1 km resolution for year 2000 (middle of study period 1989-2013).

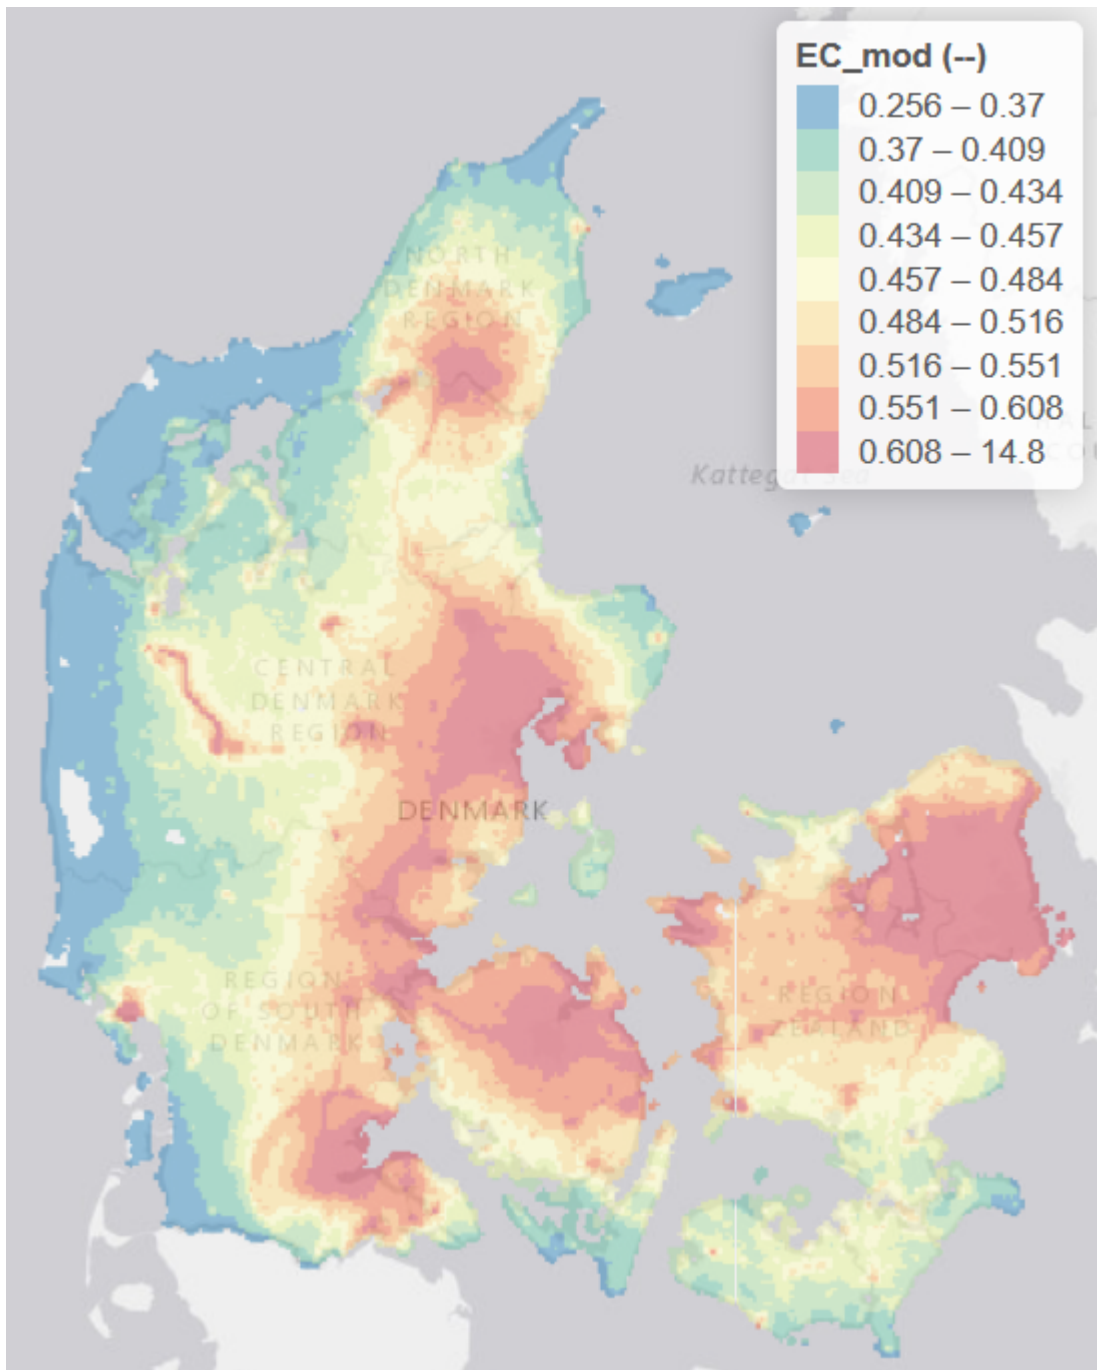

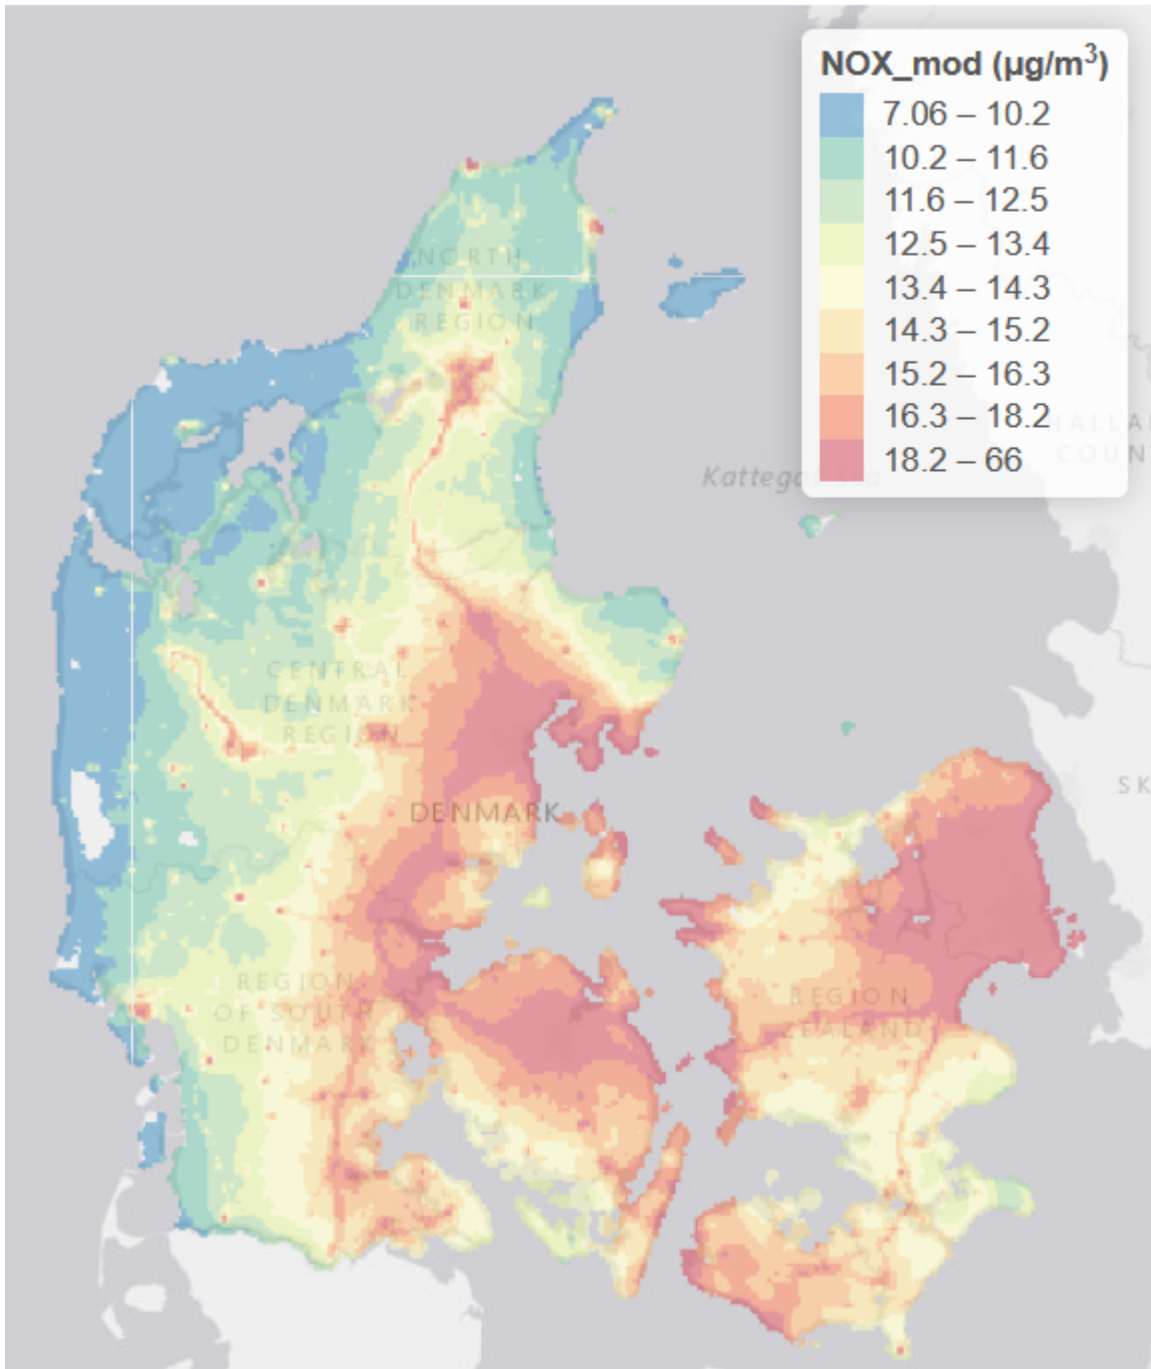

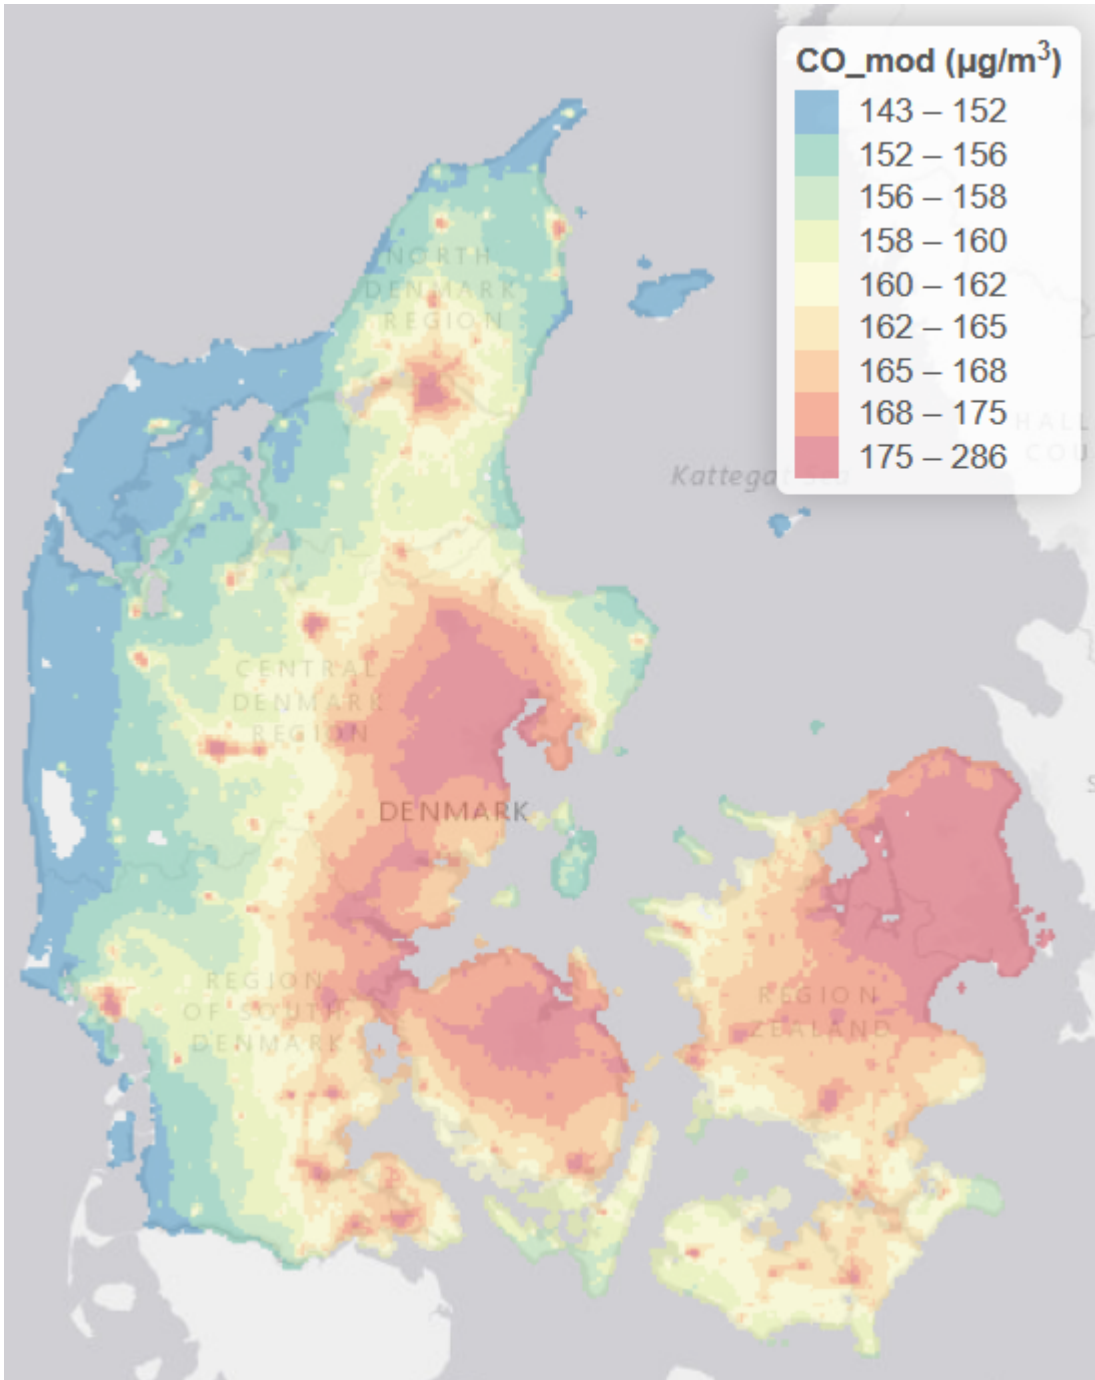



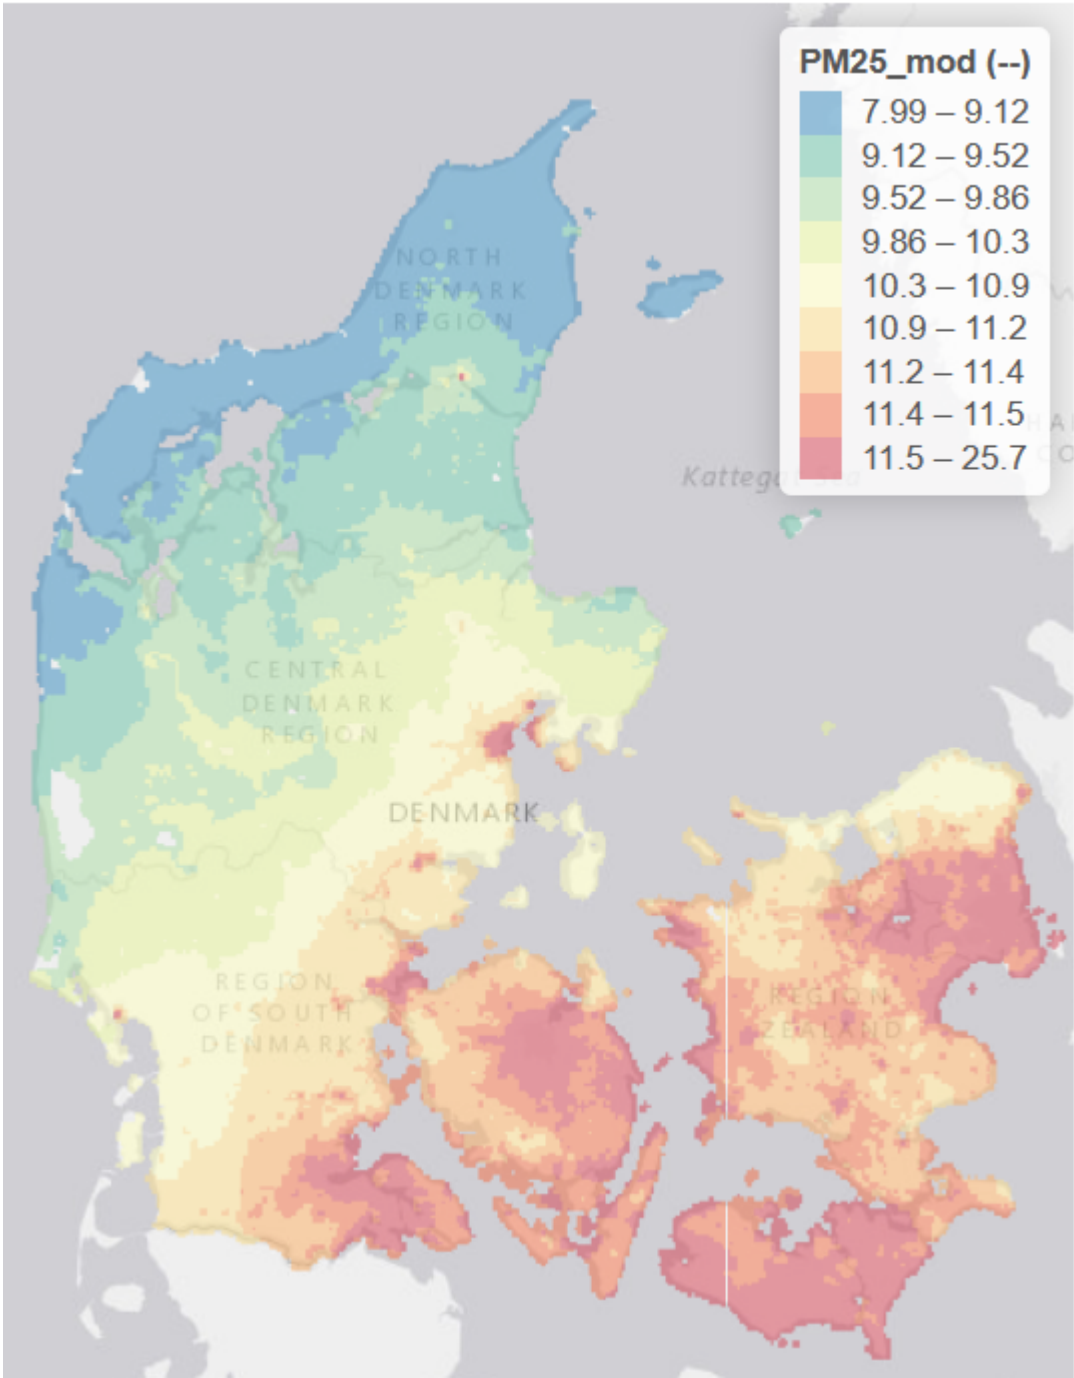

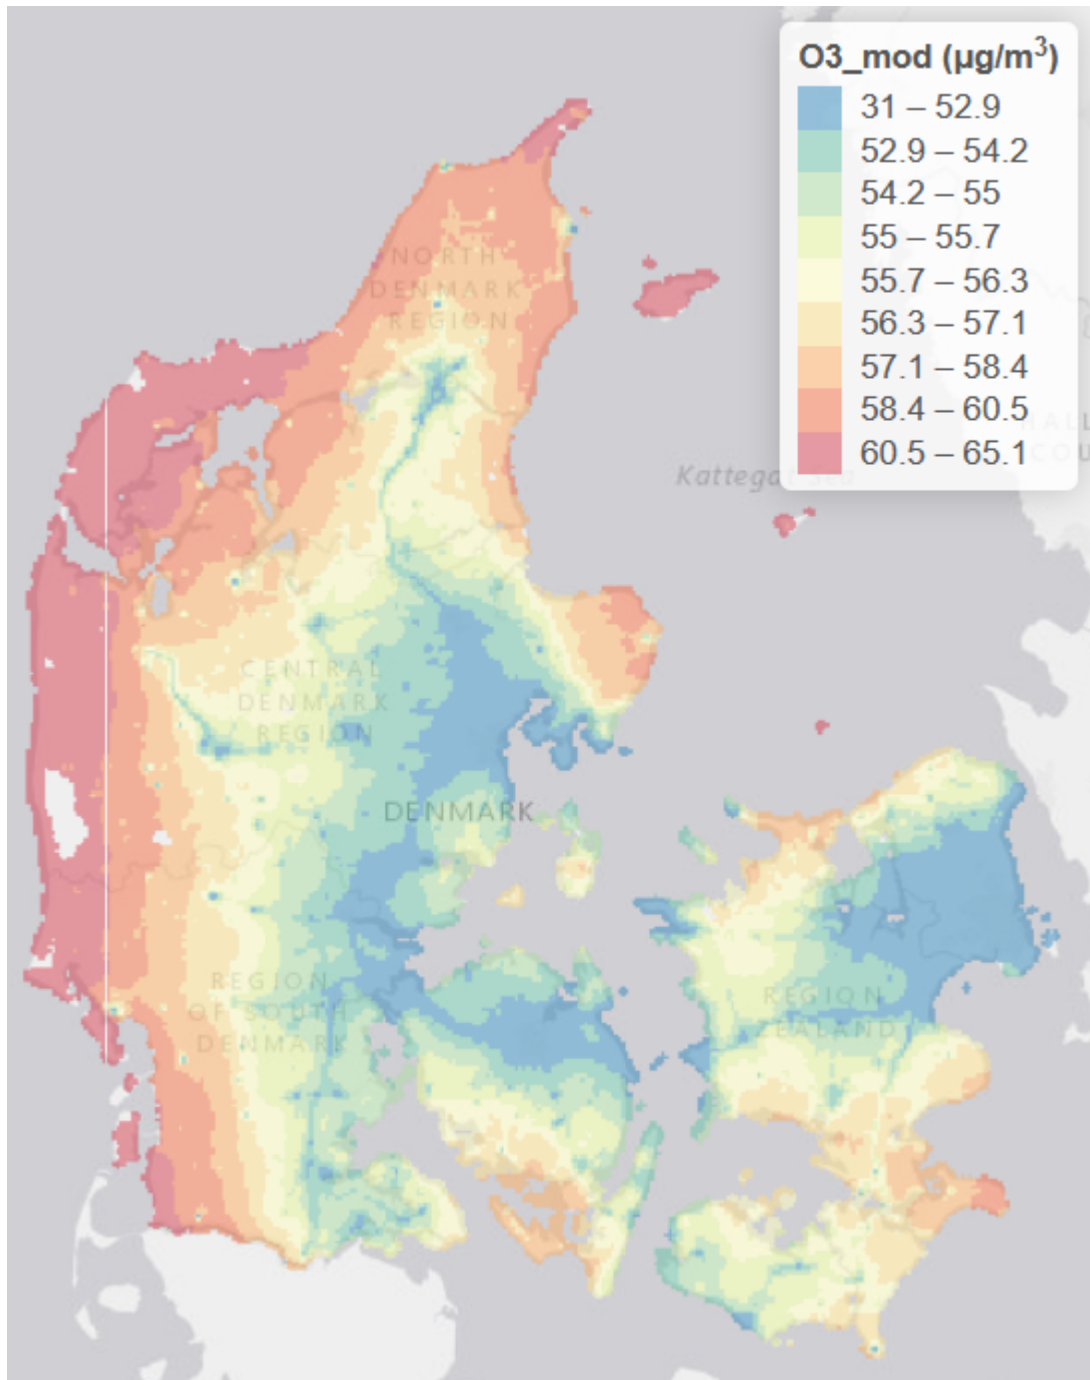

**eFigure 1.** Sensitivity of percentage change in odds of ALS diagnosis to (B) inclusion of O<sub>3</sub>; (C) inclusion of parish-level SES; (D-F) single-pollution models; (G-N) various hyperpriors; and (O-P) more iterations per chain.

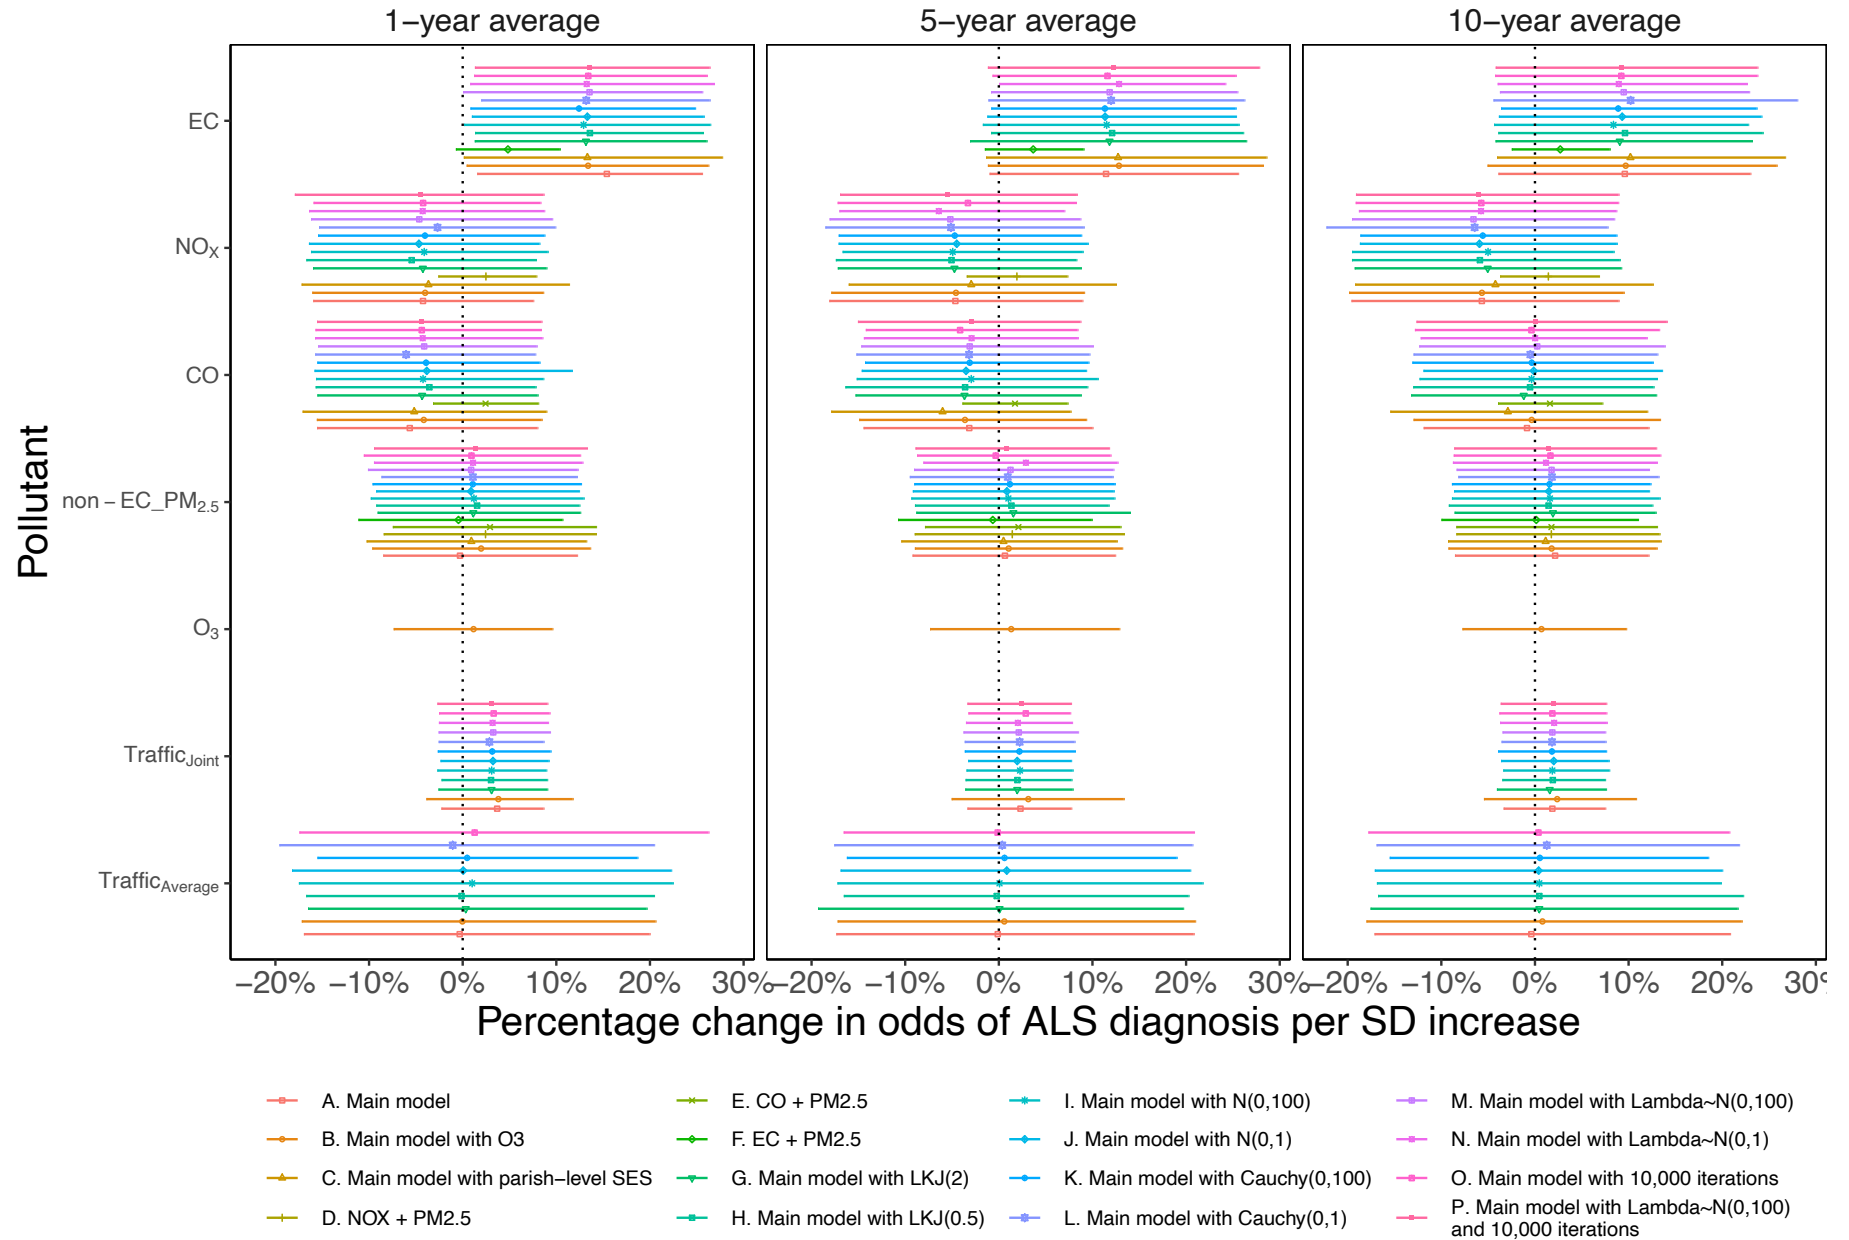

Supplement: NIHMS1825981-supplement-Supplemental_Digital_Content.pdf [file NIHMS1825981-supplement-Supplemental_Digital_Content.pdf]
